# Supplementary material for: Heteroatom preintercalated Cl-terminated Ti3C2Tx MXene wrapped with mesoporous Fe2O3 nanospheres for improved sodium ion storage
Source: Royal Society of Chemistry journal article supplement (doi:10.1039/d2nj05061g), 2022-11-24
Supplement: d2nj05061g1.pdf [file d2nj05061g1.pdf]

# New Journal of Chemistry

## Supporting information

### Heteroatoms preintercalated Cl-terminated $\text{Ti}_3\text{C}_2\text{T}_x$ MXene wrapped with Mesoporous $\text{Fe}_2\text{O}_3$ Nanospheres for improved Sodium ion Storage

Yishao Liu<sup>a</sup>, Chenyu Gao<sup>a</sup>, Ruxuan Zhou<sup>a</sup>, Feng Hong<sup>a</sup>, Guoqing Tong<sup>a</sup>, Li Wang<sup>b,\*</sup>,

Yang Jiang<sup>a,\*</sup>

<sup>a</sup>School of Materials Science and Engineering, <sup>b</sup>School of Chemistry and Chemical Engineering,  
Hefei University of Technology, 230009, Hefei, P. R. China.

\*Corresponding authors: Yang Jiang (email: apjiang@hfut.edu.cn), and Li Wang (email:  
wlgmri@sina.com)

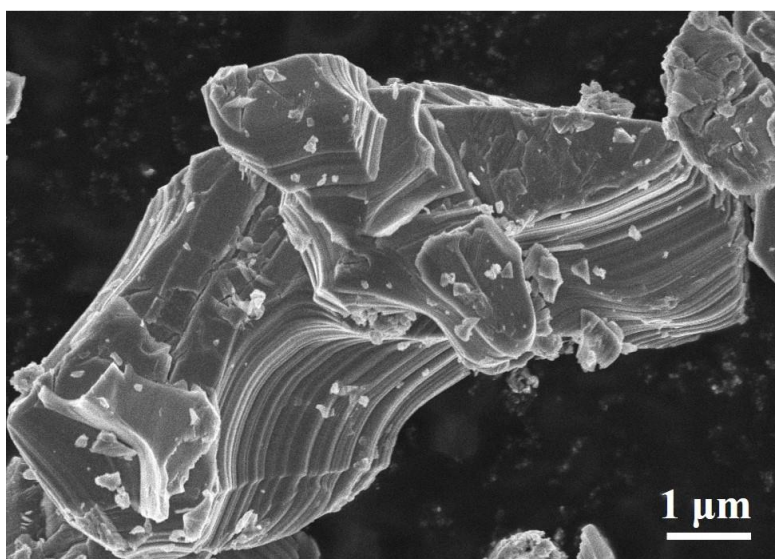

**Figure S1. SEM image of the densely packed  $\text{Ti}_3\text{AlC}_2$  precursor.**

a)

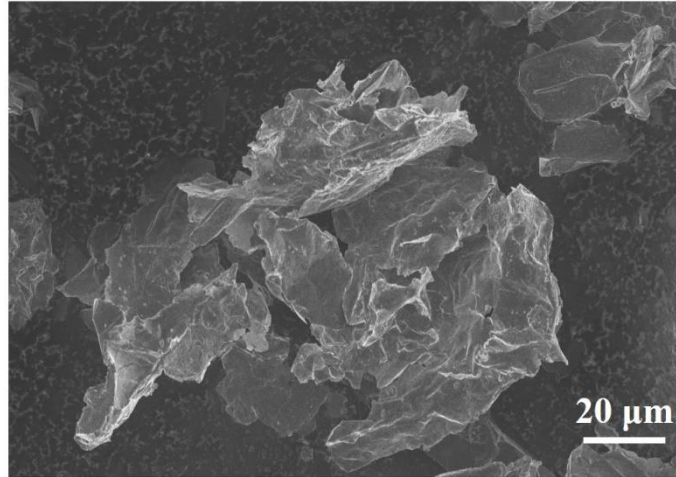

Figure S2(a). SEM image of  $\text{Ti}_3\text{C}_2\text{T}_x$  MXene nanosheets after borohydride treatment.

b)

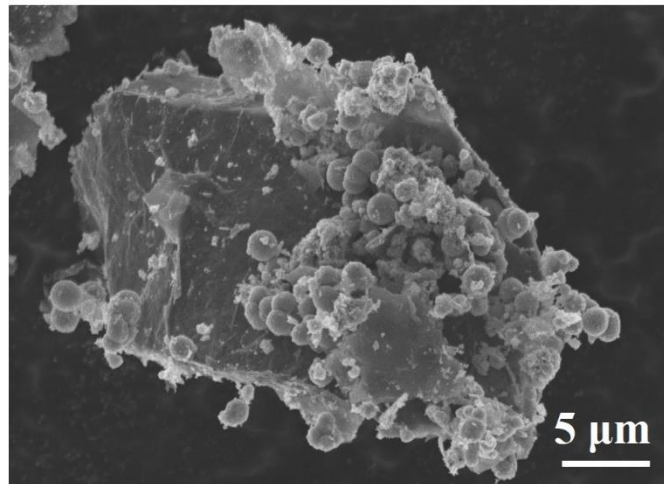

Figure S2(b). SEM image of  $\text{Fe}_2\text{O}_3\text{-Ti}_3\text{C}_2\text{T}_x$  composite.

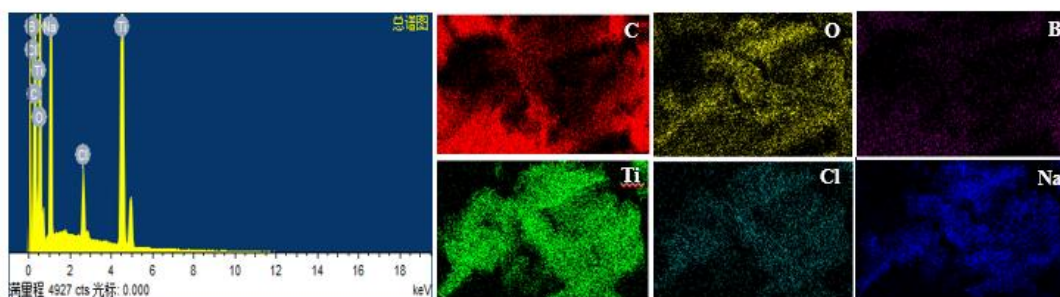

**Figure S3. EDS mapping images of  $\text{Ti}_3\text{C}_2\text{T}_x$  MXene nanosheets after borohydride treatment.**

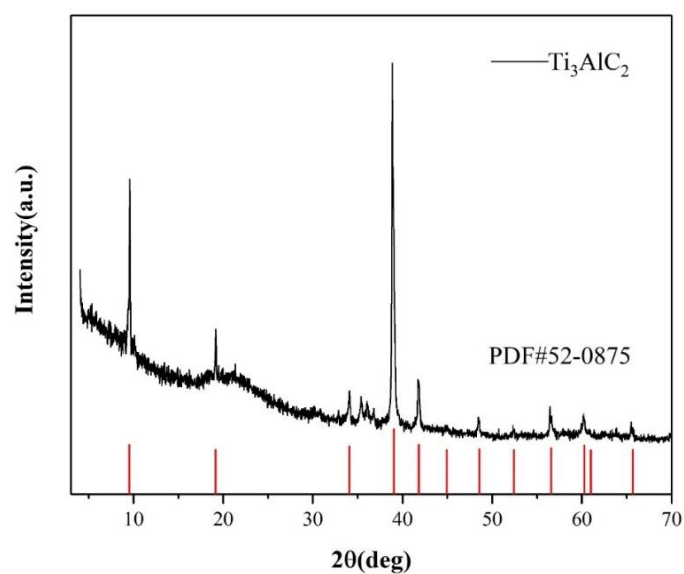

**Figure S4. XRD pattern of pristine  $\text{Ti}_3\text{AlC}_2$ .**

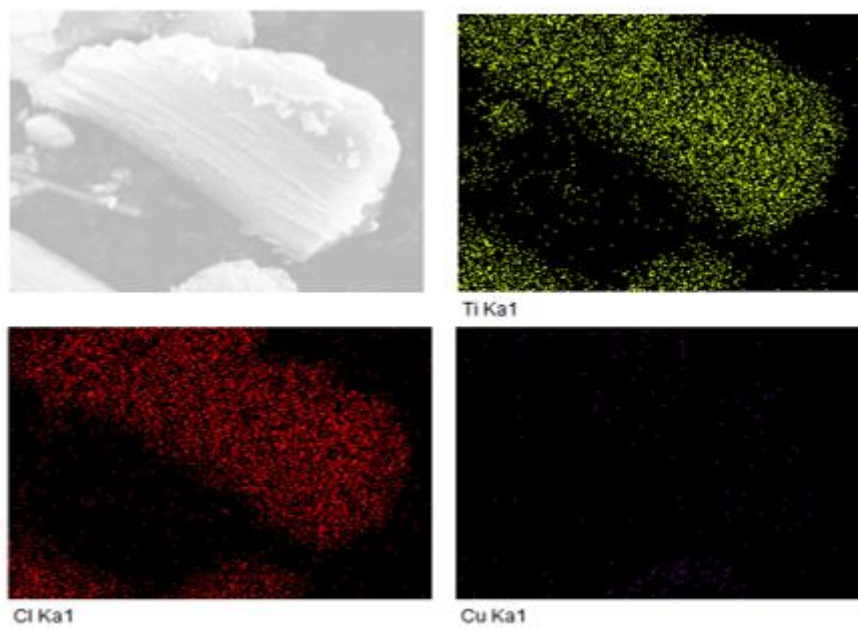

**Figure S5. The corresponding EDS mapping images of Cl-terminated  $\text{Ti}_3\text{C}_2\text{T}_x$  MXene after APS solution treatment.**

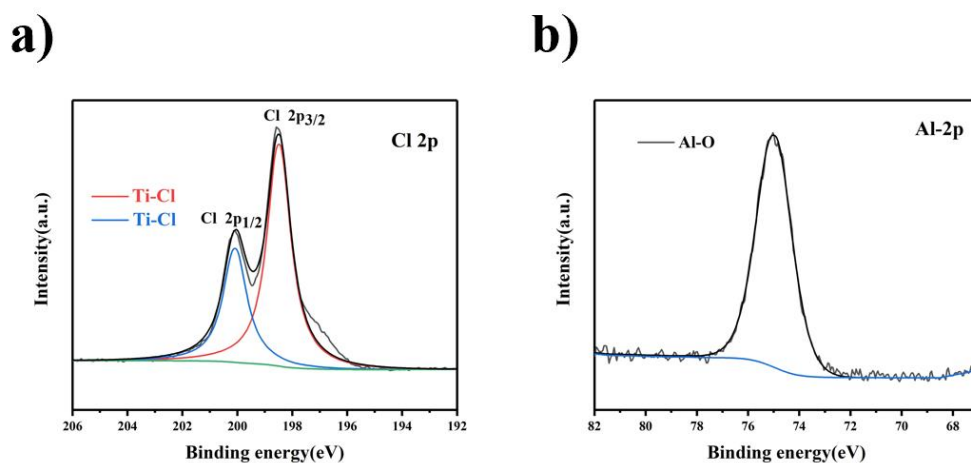

Figure S6. The high-resolution spectra of (a) the Cl 2p for Fe<sub>2</sub>O<sub>3</sub>@Ti<sub>3</sub>C<sub>2</sub>T<sub>x</sub> composite, (b) and the Al 2p for Ti<sub>3</sub>C<sub>2</sub>T<sub>x</sub> MXene.

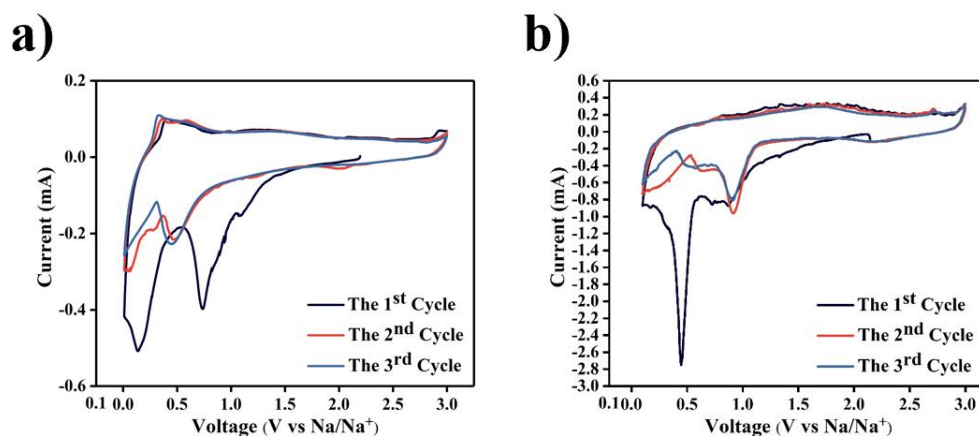

Figure S7. The CV curves of (a) Ti<sub>3</sub>C<sub>2</sub>T<sub>x</sub> MXene, (b) and Fe<sub>2</sub>O<sub>3</sub> for initial three cycles at a scan rate of 0.1 mV s<sup>-1</sup>.

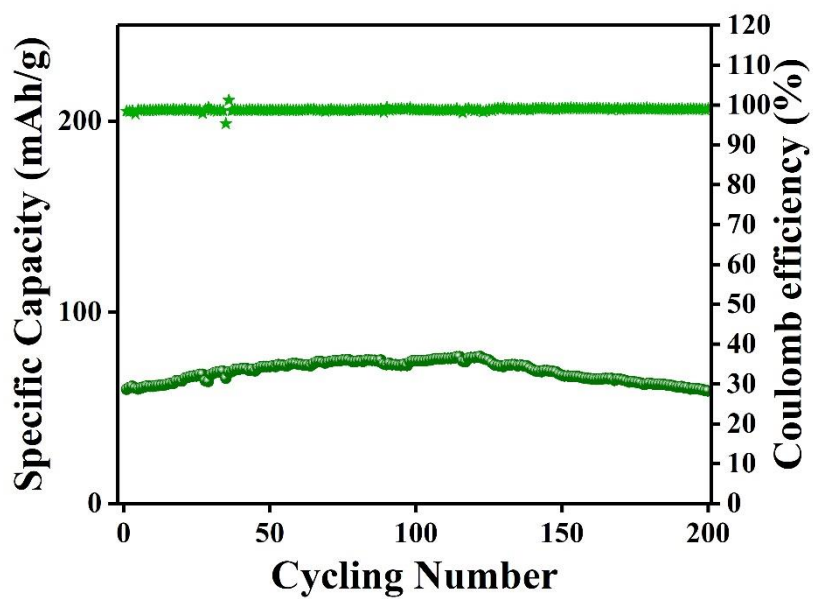

Figure S8. Cycling performance of MXene without heteroatoms pre-intercalation at a current density of  $1.0 \text{ A g}^{-1}$ .

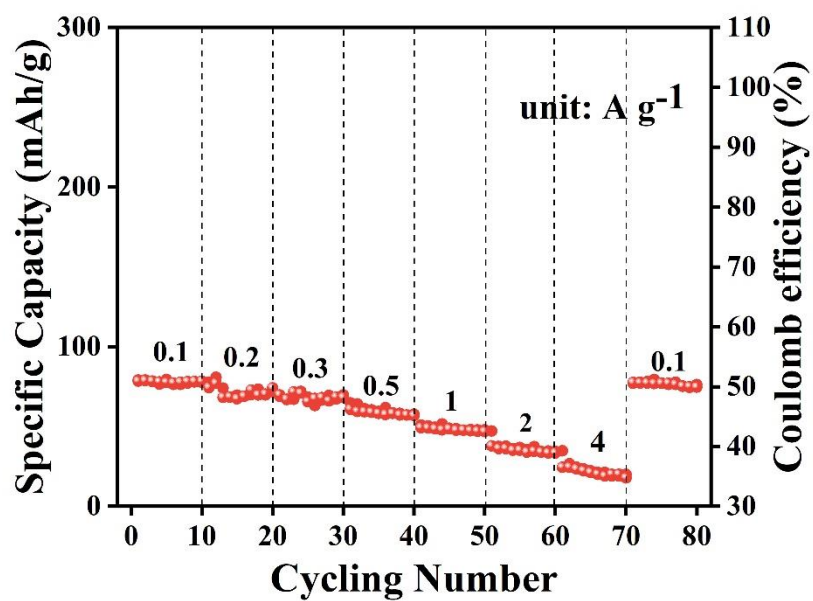

Figure S9. Rate capability performance of MXene without heteroatoms pre-intercalation anode.

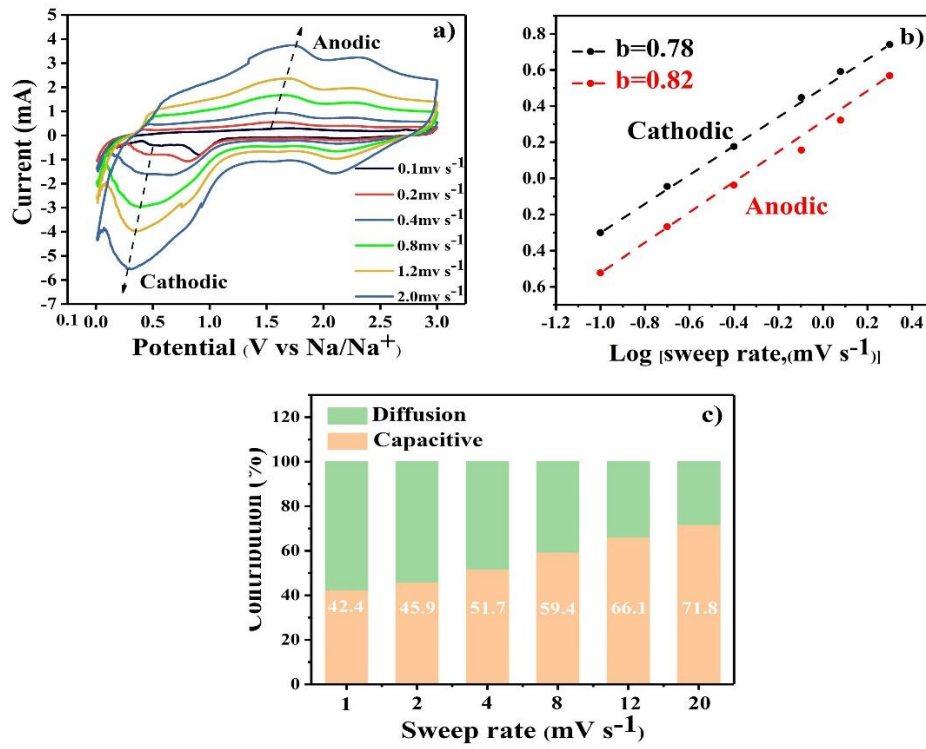

**Figure S10. CV curves(a), Log (peak current) versus log (sweep rate) plots(b), and Contribution ratios of capacitive and diffusion-controlled behaviors(c) at different sweep rates of  $\text{Fe}_2\text{O}_3$  electrode.**

| Materials                                                         | Performance                                                                          |                                                                            | References      |
|-------------------------------------------------------------------|--------------------------------------------------------------------------------------|----------------------------------------------------------------------------|-----------------|
|                                                                   | Cycling [Capacity(mA h g <sup>-1</sup> )/Current density(A g <sup>-1</sup> )/Cycles] | Rate [Capacity(mA h g <sup>-1</sup> )/Current density(A g <sup>-1</sup> )] |                 |
| Fe <sub>2</sub> O <sub>3</sub> @MXene                             | 350/1/200                                                                            | 188.5/4                                                                    | This work       |
| Fe <sub>2</sub> O <sub>3</sub> @mGC                               | 377/0.1/100                                                                          | 267/4                                                                      | S1 <sup>1</sup> |
| Hierarchical Fe <sub>3</sub> O <sub>4</sub> hollow nanostructures | 150/0.1/50                                                                           | 80/1                                                                       | S2 <sup>2</sup> |
| Fe <sub>2</sub> O <sub>3</sub> :Ge NFs                            | 320/0.05/50                                                                          | 140/2                                                                      | S3 <sup>3</sup> |
| C@Fe <sub>2</sub> O <sub>3</sub>                                  | 305/0.05/100                                                                         | 150/1                                                                      | S4 <sup>4</sup> |
| Fe <sub>2</sub> O <sub>3</sub> @GNS                               | 440/0.1/100                                                                          | 126/2                                                                      | S5 <sup>5</sup> |
| MFe <sub>2</sub> O <sub>3</sub> @N-HCNs                           | 417/0.1/100                                                                          | 102/5                                                                      | S6 <sup>6</sup> |

**Table S1. Comparison of electrochemical performance for the similar anode materials from this work and previous reports**

#### References:

1. T. Hou, X. Sun, D. Xie, M. Wang, A. Fan, Y. Chen, S. Cai, C. Zheng and W. Hu, 2018, **24**, 14786-14793.
2. K. Zhou, Y. Zhen, Z. Hong, J. Guo and Z. Huang, *Materials Letters*, 2017, **190**, 52-55.
3. B. Petrovičová, C. Ferrara, G. Brugnetti, C. Ritter, M. Fracchia, P. Ghigna, S. Pollastri, C. Triolo, L. Spadaro, R. Ruffo and S. Santangelo, 2021, **11**, 1483.
4. Y. Zhang, Z. Bakenov, T. Tan and J. Huang, 2018, **8**, 461.
5. D. Li, J. Zhou, X. Chen and H. Song, *ACS Applied Materials & Interfaces*, 2016, **8**, 30899-30907.
6. M. Chen, D. Niu, J. Mao, G. Jiang, K. Li, G. Huang, X. Jin and Y. Li, *ACS Applied Energy Materials*, 2021, **4**, 5888-5896.
